# Supplementary material for: Predictors of Changes in Physical Activity and Sedentary Behavior during the COVID-19 Pandemic in a Turkish Migrant Cohort in Germany
Source: MDPI journal article supplement (doi:10.3390/ijerph18189682), 2021-09-14
Supplement: s1 [file s1]

Table S1. Contingency coefficients\* of different physical activities.

|                 | PA at Work | PA at Home | Leisure-Time PA | Sporting PA | PA as Transport |
|-----------------|------------|------------|-----------------|-------------|-----------------|
| PA at work      | 1          | 0.5        | 0.6             | 0.6         | 0.6             |
| PA at home      | -          | 1          | 0.4             | 0.54        | 0.4             |
| Leisure-time PA | -          | -          | 1               | 0.7         | 0.7             |
| Sporting PA     | -          | -          | -               | 1           | 0.7             |
| PA as transport | -          | -          | -               | -           | 1               |

\*0–0.2 weak association, >0.2–0.6 moderate association, >0.6–1 strong association (TSC Germany (Hrsg), 2014).

Table S2. Factors associated with reduced physical activity (PA) and/or increased sedentary behavior (SB). Univariable regression analysis for the outcome Less activity/more sedentary behavior.

|                                        | PA at Work          | PA at Home           | Leisure-Time PA     | Sporting PA         | Active Transport    | Sedentary Behavior |
|----------------------------------------|---------------------|----------------------|---------------------|---------------------|---------------------|--------------------|
|                                        |                     |                      | Less PA*            |                     |                     | More SB**          |
|                                        |                     |                      | OR (95% CI)         |                     |                     |                    |
| Socio-demographics                     |                     |                      |                     |                     |                     |                    |
| Age difference                         | –0.1<br>(–5.5; 5.3) | 3.5<br>(–5.0; 12.0)  | –0.3<br>(–4.9; 4.4) | –1.0<br>(–5.7; 3.7) | –0.7<br>(–5.4; 4.0) | 1.8<br>(–3.1; 6.7) |
| Sex                                    |                     |                      |                     |                     |                     |                    |
| female (Reference)                     | 1                   | 1                    | 1                   | 1                   | 1                   | 1                  |
| male                                   | 0.6 (0.3;1.6)       | 0.4 (0.1;2.3)        | 1.1 (0.5;2.4)       | 0.6 (0.3;1.3)       | 0.4 (0.2;0.9)       | 0.7 (0.3;1.6)      |
| Education                              |                     |                      |                     |                     |                     |                    |
| <10 years (Reference)                  | 1                   | 1                    | 1                   | 1                   | 1                   | 1                  |
| 10–12 years                            | 0.8 (0.3;2.5)       | 0.6 (0.1;2.9)        | 2.3 (0.9;6.0)       | 1.3 (0.5;3.3)       | 0.7 (0.3;1.9)       | 1.5 (0.6;4.0)      |
| >12 years                              | 0.7 (0.2;2.3)       | No data available    | 0.7 (0.2;2.2)       | 1.3 (0.4;4.0)       | 0.8 (0.3;2.5)       | 1.3 (0.4;4.2)      |
| Employed                               |                     |                      |                     |                     |                     |                    |
| Yes (reference)                        | 1                   | 1                    | 1                   | 1                   | 1                   | 1                  |
| No                                     | 0.8 (0.3;2.1)       | 0.8 (0.2;3.6)        | 0.8 (0.4;1.8)       | 1.0 (0.4;2.2)       | 1.1 (0.5;2.6)       | 1.3 (0.6;3.0)      |
| Questionnaire language                 |                     |                      |                     |                     |                     |                    |
| German (Reference)                     | 1                   | 1                    | 1                   | 1                   | 1                   | 1                  |
| Turkish                                | 0.9 (0.3;2.3)       | 1.0 (0.2;4.5)        | 1.7 (0.8;3.8)       | 1.5 (0.6;3.4)       | 3.2 (1.3;7.5)       | 1.2 (0.5;2.7)      |
| Own migration experience               |                     |                      |                     |                     |                     |                    |
| Yes (Reference)                        | 1                   | 1                    | 1                   | 1                   | 1                   | 1                  |
| No                                     | 0.8 (0.2;2.5)       | No data available    | 2.5 (0.8;7.7)       | 1.1 (0.4;3.3)       | 0.8 (0.3;2.6)       | 1.0 (0.3;3.0)      |
| Health status                          |                     |                      |                     |                     |                     |                    |
| Normal or overweight (Reference)       | 1                   | 1                    | 1                   | 1                   | 1                   | 1                  |
| obesity                                | 1.2 (0.4;3.4)       | 0.2 (0.03;2.2)       | 1.9 (0.8;4.5)       | 1.8 (0.7;4.4)       | 5.1 (2.0;13.4)      | 1.5 (0.6;3.7)      |
| Smoking behavior                       |                     |                      |                     |                     |                     |                    |
| Smokers (Reference)                    | 1                   | 1                    | 1                   | 1                   | 1                   | 1                  |
| Never or Ex-Smoker                     | 1.0 (0.4;2.8)       | 0.4 (0.1;1.8)        | 0.6 (0.3;1.4)       | 1.4 (0.6;3.4)       | 0.9 (0.4;2.2)       | 1.0 (0.4;2.5)      |
| At least 150min/week physically active |                     |                      |                     |                     |                     |                    |
| Yes (Reference)                        | 1                   | 1                    | 1                   | 1                   | 1                   | 1                  |
| no                                     | 1.45 (0.39;5.41)    | 1.24<br>(0.13;11.82) | 1.57 (0.54;4.58)    | 4.94 (1.54;15.84)   | 1.14 (0.39;3.38)    | 6.56 (1.38;31.23)  |
| Subjective health status               |                     |                      |                     |                     |                     |                    |
| Good, very good, excellent (Reference) | 1                   | 1                    | 1                   | 1                   | 1                   | 1                  |

|                                      |                  |                      |                  |                  |                  |                  |
|--------------------------------------|------------------|----------------------|------------------|------------------|------------------|------------------|
| Not so good, poor                    | 1.82 (0.60;5.51) | 2.27<br>(0.50;10.38) | 1.02 (0.40;2.60) | 1.08 (0.41;2.86) | 1.18 (0.45;3.08) | 1.31 (0.50;3.45) |
| Depressive symptoms                  |                  |                      |                  |                  |                  |                  |
| No (PHQ-9 score < 10)<br>(Reference) | 1                | 1                    | 1                | 1                | 1                | 1                |
| Yes (PHQ-9 score ≥ 10)               | 2.33 (0.83;6.54) | 0.89 (0.16;4.87)     | 1.55 (0.64;3.73) | 1.49 (0.60;3.73) | 2.38 (0.96;5.88) | 2.37 (0.95;5.91) |

\*Less or much less vs. no change, more or much more; \*\* More or much more vs. no change, less or much less.
